# Supplementary material for: Efferocytosis of SARS-CoV-2-infected dying cells impairs macrophage anti-inflammatory functions and clearance of apoptotic cells
Source: eLife. 2022 Jun 6;11:e74443. doi: 10.7554/eLife.74443 (PMC9262386; doi:10.7554/eLife.74443)
Supplement: Figure 1—figure supplement 1—source data 1. [file elife-74443-fig1-figsupp1-data1.xlsx]

## Sheet: FigS1
Fig S1B
CoV2-AC - Calu	Supernatant Calu
3162.28	1492.84
14928.4	1492.84
3162.28	316.228
Unpaired t test with Welch's correction
P value	0.266
P value summary	ns
Significantly different (P < 0.05)?	No
One- or two-tailed P value?	Two-tailed
Welch-corrected t, df	t=1,518, df=2,040
CoV2-AC - Vero	Supernatant Vero
14928.4	3162.28
31622.8	316.228
3162.28	316.228
Unpaired t test with Welch's correction
P value	0.2036
P value summary	ns
Significantly different (P < 0.05)?	No
One- or two-tailed P value?	Two-tailed
Welch-corrected t, df	t=1,842, df=2,053
Fig S1C
UV-AC (Calu-3)	CoV2-AC (Calu-3)
35.8	51.8
37.2	54
40.8	52.1
Unpaired t test
P value	0.0009
Significantly different (P < 0.05)?	Yes
One- or two-tailed P value?	Two-tailed
t, df	t=8,959, df=4
UV-AC (Vero)	CoV2-AC (Vero)
31.2	68.7
37.3	68.4
34.6	70.2
Unpaired t test
P value	<0,0001
Significantly different (P < 0.05)?	Yes
One- or two-tailed P value?	Two-tailed
t, df	t=18,77, df=4
Fig S1E
Primary Mac
Cntrl	UV-AC	CoV2-AC	CoV2- AC Sup	CoV2
95.7	85.5	81.9	95.8	86.9
90.9	87	83.1	97.1	89
94.8	84.5	82.5	97.5	88.1
Tukey's multiple comparisons test	Mean Diff,	95,00% CI of diff,	Significant?	Adjusted P Value
Cntrl vs. UV-AC	8.133	4,267 to 12,00	Yes	0.0003
Cntrl vs. CoV2-AC	11.3	7,433 to 15,17	Yes	<0,0001
Cntrl vs. CoV2- AC Sup	-3	-6,867 to 0,8668	No	0.1539
Cntrl vs. CoV2	5.8	1,933 to 9,667	Yes	0.0042
UV-AC vs. CoV2-AC	3.167	-0,7001 to 7,033	No	0.1247
UV-AC vs. CoV2- AC Sup	-11.13	-15,00 to -7,267	Yes	<0,0001
UV-AC vs. CoV2	-2.333	-6,200 to 1,533	No	0.3376
CoV2-AC vs. CoV2- AC Sup	-14.3	-18,17 to -10,43	Yes	<0,0001
CoV2-AC vs. CoV2	-5.5	-9,367 to -1,633	Yes	0.006
CoV2- AC Sup vs. CoV2	8.8	4,933 to 12,67	Yes	0.0002
THP1 Mac
Cntrl	UV-AC	CoV2-AC	CoV2- AC Sup	CoV2
80.7	74.4	84.1	86.5	87.6
86.5	76.9	86	86.1	86.9
81.3	73.7	87.9	85.3	86
Tukey's multiple comparisons test	Mean Diff,	95,00% CI of diff,	Significant?	Adjusted P Value
Cntrl vs. UV-AC	7.833	2,787 to 12,88	Yes	0.0033
Cntrl vs. CoV2-AC	-3.167	-8,213 to 1,879	No	0.3047
Cntrl vs. CoV2- AC Sup	-3.133	-8,179 to 1,913	No	0.3135
Cntrl vs. CoV2	-4	-9,046 to 1,046	No	0.1418
UV-AC vs. CoV2-AC	-11	-16,05 to -5,954	Yes	0.0002
UV-AC vs. CoV2- AC Sup	-10.97	-16,01 to -5,921	Yes	0.0002
UV-AC vs. CoV2	-11.83	-16,88 to -6,787	Yes	0.0001
CoV2-AC vs. CoV2- AC Sup	0.03333	-5,013 to 5,079	No	>0,9999
CoV2-AC vs. CoV2	-0.8333	-5,879 to 4,213	No	0.9803
CoV2- AC Sup vs. CoV2	-0.8667	-5,913 to 4,179	No	0.9773
