# Supplementary material for: Efferocytosis of SARS-CoV-2-infected dying cells impairs macrophage anti-inflammatory functions and clearance of apoptotic cells
Source: eLife. 2022 Jun 6;11:e74443. doi: 10.7554/eLife.74443 (PMC9262386; doi:10.7554/eLife.74443)
Supplement: Figure 1—source data 1. [file elife-74443-fig1-data1.xlsx]

## Sheet: Fig1
Fig 1B
Cl-caspase 3 MIF
Cntrl (dmso)	CoV2-AC	Cntrl (zvad)	CoV2-AC (zVad)
0.141274	0.464454	0.101929	0.348696
0.300482	1.96673	0.157294	0.174538
0.178475	2.56603	0.073487	0.694306
0.176778	0.653248	0.2148	0.36344
0.189363	1.68314	0.023804	0.495524
Tukey's multiple comparisons test	Mean Diff,	95,00% CI of diff,	Significant?	Adjusted P Value
Cntrl (dmso) vs. CoV2-AC	-1.269	-2,098 to -0,4405	Yes	0.0024
Cntrl (dmso) vs. Cntrl (zvad)	0.08301	-0,7459 to 0,9119	No	0.9915
Cntrl (dmso) vs. CoV2-AC (zVad)	-0.218	-1,047 to 0,6109	No	0.8743
CoV2-AC vs. Cntrl (zvad)	1.352	0,5236 to 2,181	Yes	0.0013
CoV2-AC vs. CoV2-AC (zVad)	1.051	0,2225 to 1,880	Yes	0.0109
Cntrl (zvad) vs. CoV2-AC (zVad)	-0.301	-1,130 to 0,5279	No	0.7297
Cl-caspase 3 %
Cntrl (dmso)	CoV2-AC	Cntrl (zvad)	CoV2-AC (zVad)
9.77	28.2	8.24	23.2
18.2	60.2	11.8	13.7
12.1	69.9	5.96	35.9
12.2	34.6	15	23.6
14.1	58.2	2.49	29.2
Tukey's multiple comparisons test	Mean Diff,	95,00% CI of diff,	Significant?	Adjusted P Value
Cntrl (dmso) vs. CoV2-AC	-36.95	-55,51 to -18,38	Yes	0.0002
Cntrl (dmso) vs. Cntrl (zvad)	4.576	-13,99 to 23,14	No	0.8935
Cntrl (dmso) vs. CoV2-AC (zVad)	-11.85	-30,41 to 6,718	No	0.2979
CoV2-AC vs. Cntrl (zvad)	41.52	22,96 to 60,09	Yes	<0,0001
CoV2-AC vs. CoV2-AC (zVad)	25.1	6,536 to 43,66	Yes	0.0067
Cntrl (zvad) vs. CoV2-AC (zVad)	-16.42	-34,99 to 2,142	No	0.0927
Fig 1C
	Live (Ann- Zombie-)				Apoptotic (Ann+ Zombie-)				Late Apoptotic (Ann+ Zombie+)				Necrotic (Ann- Zombie+)
UV irradiation	51	53	51.8	52.2	45.9	43.6	37.6	44.6	3.05	3.34	10.6	3.18	0.041	0.014	0.022	0.013
CoV2 48h	57.5	48.1	58.9	57	40.4	48.8	37.6	40.6	1.94	2.9	3.07	2.22	0.15	0.15	0.4	0.22
Sidak's multiple comparisons test	Mean Diff,	95,00% CI of diff,	Significant?	Adjusted P Value
UV irradiation
Live (Ann- Zombie-) vs. Apoptotic (Ann+ Zombie-)	9.075	3,492 to 14,66	Yes	0.001
Live (Ann- Zombie-) vs. Late Apoptotic (Ann+ Zombie+)	46.96	41,37 to 52,54	Yes	<0,0001
Live (Ann- Zombie-) vs. Necrotic (Ann- Zombie+)	51.98	46,39 to 57,56	Yes	<0,0001
CoV2 48h
Live (Ann- Zombie-) vs. Apoptotic (Ann+ Zombie-)	13.53	7,942 to 19,11	Yes	<0,0001
Live (Ann- Zombie-) vs. Late Apoptotic (Ann+ Zombie+)	52.84	47,26 to 58,43	Yes	<0,0001
Live (Ann- Zombie-) vs. Necrotic (Ann- Zombie+)	55.15	49,56 to 60,73	Yes	<0,0001
Fig 1D
Live	UV irrad.	CoV2
4.7017	9.64045	8.02054
4.22758	10.3516	7.38838
3.59542	9.83801	8.77123
3.83248	11.774	7.70446
5.25484	13.3544	9.20584
Tukey's multiple comparisons test	Mean Diff,	95,00% CI of diff,	Significant?	Adjusted P Value
Live vs. UV irrad.	-6.669	-8,480 to -4,858	Yes	<0,0001
Live vs. CoV2	-3.896	-5,707 to -2,085	Yes	0.0003
UV irrad. vs. CoV2	2.774	0,9626 to 4,585	Yes	0.004
Fig 1E
Cntrl	1.26462	1.6749	2.0547	2.9426	2.04239	1.68596	2.5864	1.57992	1.52434	1.56604	1.61506	2.12975	2.60062	1.18776	1.92635	1.44656	1.4517	1.95362	1.69015	2.25427	1.80102	2.07498	2.05996	2.30379	3.15713	1.8198	1.89983	2.43738	1.69987	1.64389	1.45497	1.43867	1.7339	1.69989	1.90065	1.81517	2.36895	2.12849	1.24164	1.49211	1.41666	1.56848	1.71097	1.79337	1.83979	1.84211	1.59757	1.26462	1.6749
COVID19	5.1	5.07	4.64	3.59	5.4	4.72	3.85	7.12	4.25	4.82	5.26	5.46	4.15	4.71	5.63	4.93	5.33	5.97	3.83	4.17	3.98	4.06	3.95	4.69	7.94	4.15	3.49	5.3	5.63	4.57	5.06	3.78	4.7	3.5	3.27	4.71	4.2	4.78	4.37	4.5	3.57	2.97	7.37	4.63	4.81	4.9	5.74	3.94	3.86
Mann Whitney test
P value	<0,0001
Exact or approximate P value?	Approximate
Significantly different (P < 0.05)?	Yes
One- or two-tailed P value?	Two-tailed
Sum of ranks in column A,B	68211 , 161970
Mann-Whitney U	10241
Fig 1G
Total cells	Ann+cells
31622780	31622780
31622780	31622780
31622780	316228
Unpaired t test
P value	0.3739
P value summary	ns
Significantly different (P < 0.05)?	No
One- or two-tailed P value?	Two-tailed
t, df	t=1,000, df=4
Fig 1H
AC-UV	CoV2-AC
25.5	26.8
24.7	23.8
27	28
27.9	25.5
22.5
Unpaired t test
P value	0.7147
Significantly different (P < 0.05)?	No
One- or two-tailed P value?	Two-tailed
t, df	t=0,3807, df=7
[truncated: 291 more columns]
