# Supplementary material for: Efferocytosis of SARS-CoV-2-infected dying cells impairs macrophage anti-inflammatory functions and clearance of apoptotic cells
Source: eLife. 2022 Jun 6;11:e74443. doi: 10.7554/eLife.74443 (PMC9262386; doi:10.7554/eLife.74443)
Supplement: Figure 2—figure supplement 1—source data 1. [file elife-74443-fig2-figsupp1-data1.xlsx]

## Sheet: FigS2
Fig S2B
Cntrl	UV-AC	CoV2-AC	CoV2- AC Sup	CoV2
1.74224	3.51474	0.219163	0.272812	0.274807
0.29494	3.16954	0.230109	0.275864	0.420407
1.94607	4.11216	0.227214	0.228161	0.320875
Tukey's multiple comparisons test	Mean Diff,	95,00% CI of diff,	Significant?	Adjusted P Value
Cntrl vs. UV-AC	-2.271	-3,499 to -1,043	Yes	0.0009
Cntrl vs. CoV2-AC	1.102	-0,1257 to 2,330	No	0.0841
Cntrl vs. CoV2- AC Sup	1.069	-0,1592 to 2,297	No	0.0965
Cntrl vs. CoV2	0.9891	-0,2389 to 2,217	No	0.1332
UV-AC vs. CoV2-AC	3.373	2,145 to 4,601	Yes	<0,0001
UV-AC vs. CoV2- AC Sup	3.34	2,112 to 4,568	Yes	<0,0001
UV-AC vs. CoV2	3.26	2,032 to 4,488	Yes	<0,0001
CoV2-AC vs. CoV2- AC Sup	-0.03345	-1,261 to 1,195	No	>0,9999
CoV2-AC vs. CoV2	-0.1132	-1,341 to 1,115	No	0.9978
CoV2- AC Sup vs. CoV2	-0.07975	-1,308 to 1,148	No	0.9994
Fig S2C
Cntrl	UV-AC	CoV2-AC	CoV2- AC Sup
1.0503	21.0168	12.606	0.35244
1.4735	22.6687	7.7927	0.30492
6.6297		25.5184
Tukey's multiple comparisons test	Mean Diff,	95,00% CI of diff,	Significant?	Adjusted P Value
Cntrl vs. UV-AC	-18.79	-36,51 to -1,070	Yes	0.0394
Cntrl vs. CoV2-AC	-12.25	-28,11 to 3,596	No	0.127
Cntrl vs. CoV2- AC Sup	2.722	-15,00 to 20,44	No	0.9481
UV-AC vs. CoV2-AC	6.537	-11,18 to 24,26	No	0.6073
UV-AC vs. CoV2- AC Sup	21.51	2,101 to 40,93	Yes	0.0327
CoV2-AC vs. CoV2- AC Sup	14.98	-2,745 to 32,70	No	0.0941
Fig S2D
Cntrl	UV-AC	CoV2-AC	CoV2- AC Sup
0.22866	44.6777	5.6472	0.36034
0.897	35.5191	4.6965	0.672
6.0416	29.21	8.029	0.6165
Tukey's multiple comparisons test	Mean Diff,	95,00% CI of diff,	Significant?	Adjusted P Value
Cntrl vs. UV-AC	-34.08	-45,29 to -22,87	Yes	<0,0001
Cntrl vs. CoV2-AC	-3.735	-14,95 to 7,479	No	0.7178
Cntrl vs. CoV2- AC Sup	1.839	-9,375 to 13,05	No	0.9506
UV-AC vs. CoV2-AC	30.34	19,13 to 41,56	Yes	0.0001
UV-AC vs. CoV2- AC Sup	35.92	24,70 to 47,13	Yes	<0,0001
CoV2-AC vs. CoV2- AC Sup	5.575	-5,640 to 16,79	No	0.4339
Fig S2F
AC-UV	CoV2-AC + AC-UV
31622780	0
31622780	0
31622780	0
