# Supplementary material for: Efferocytosis of SARS-CoV-2-infected dying cells impairs macrophage anti-inflammatory functions and clearance of apoptotic cells
Source: eLife. 2022 Jun 6;11:e74443. doi: 10.7554/eLife.74443 (PMC9262386; doi:10.7554/eLife.74443)
Supplement: Figure 2—source data 1. [file elife-74443-fig2-data1.xlsx]

## Sheet: Fig2
Fig 2A
	CCL18			MRC1			MMP9			PPARγ			CD163
Cntrl	-0.191073	-0.183271	0.374344	0.326243	0.0709483	-0.397191	0.646133	-0.017464	-0.628668	0.402023	-0.22152	-0.180503	0.370523	0.057585	-0.428108
UV-AC	1.47409	1.61728	1.597	-0.313569	1.19153	0.907395	-0.772097	-0.095908	0.449274	-0.281935	-0.142333	0.420653	-1.2685	-0.143789	0.322036
CoV2-AC	-1.4279	-1.04609	-1.64826	-1.36568	-0.80499	-1.48895	-1.33173	-0.612484	-1.86327	-1.06658	-1.14609	-1.03361	-4.04124	-3.13809	-4.53931
CoV-2	-0.349604	-0.115377		0.215964	-0.208185		0.261407	0.111257		0.080345	1.09131		-0.002798	-0.531492
Fig 2B
Cntrl	UV-AC	CoV2-AC	CoV2
84.1897	220.45	58.5276	18.7948
17.8024	187.2	53.889	26.3088
26.2116	271.737	57.6859	21.5464
Tukey's multiple comparisons test	Mean Diff,	95,00% CI of diff,	Significant?	Adjusted P Value
Cntrl vs. UV-AC	-183.7	-257,0 to -110,5	Yes	0.0002
Cntrl vs. CoV2-AC	-13.97	-87,23 to 59,30	No	0.9259
Cntrl vs. CoV2	20.52	-52,75 to 93,79	No	0.807
UV-AC vs. CoV2-AC	169.8	96,49 to 243,0	Yes	0.0003
UV-AC vs. CoV2	204.2	131,0 to 277,5	Yes	<0,0001
CoV2-AC vs. CoV2	34.48	-38,78 to 107,8	No	0.4763
Fig 2C
Cntrl	AC engulf (-)	AC engulf (+)	iAC engulf (-)	iAC engulf (+)
0.16807	0.48174	230.679	0	59.2088
0.31152	1.118	291.84	0.11718	63.9856
1.0935	0.6006	256.464	0	46.4758
Tukey's multiple comparisons test	Mean Diff,	95,00% CI of diff,	Significant?	Adjusted P Value
Cntrl vs. AC engulf (-)	-0.2091	-38,69 to 38,27	No	>0,9999
Cntrl vs. AC engulf (+)	-259.1	-297,6 to -220,7	Yes	<0,0001
Cntrl vs. iAC engulf (-)	0.4853	-37,99 to 38,96	No	>0,9999
Cntrl vs. iAC engulf (+)	-56.03	-94,51 to -17,56	Yes	0.0051
AC engulf (-) vs. AC engulf (+)	-258.9	-297,4 to -220,5	Yes	<0,0001
AC engulf (-) vs. iAC engulf (-)	0.6944	-37,78 to 39,17	No	>0,9999
AC engulf (-) vs. iAC engulf (+)	-55.82	-94,30 to -17,35	Yes	0.0053
AC engulf (+) vs. iAC engulf (-)	259.6	221,1 to 298,1	Yes	<0,0001
AC engulf (+) vs. iAC engulf (+)	203.1	164,6 to 241,6	Yes	<0,0001
iAC engulf (-) vs. iAC engulf (+)	-56.52	-94,99 to -18,04	Yes	0.0048
Fig 2D
Cntrl	UV-AC	CoV2-AC	Cov2-AC (UV)
6.936	56.462	20.8436	179.352
1.632	65.928	29.3376	172.5
7.644	85.405	3.9396	73.021
Tukey's multiple comparisons test	Mean Diff,	95,00% CI of diff,	Significant?	Adjusted P Value
Cntrl vs. UV-AC	-63.86	-145,9 to 18,17	No	0.1357
Cntrl vs. CoV2-AC	-12.64	-94,67 to 69,40	No	0.9584
Cntrl vs. Cov2-AC (UV)	-136.2	-218,3 to -54,19	Yes	0.0032
UV-AC vs. CoV2-AC	51.22	-30,81 to 133,3	No	0.2642
UV-AC vs. Cov2-AC (UV)	-72.36	-154,4 to 9,674	No	0.0852
CoV2-AC vs. Cov2-AC (UV)	-123.6	-205,6 to -41,55	Yes	0.0057
Fig 2E
Cntrl	UV-AC	CoV2-AC	UV-AC + CoV2	CoV2
38.4656	239.148	115.101	179.36	27.9196
57.33	193.747	140.184	202.521	34.3908
45.2631	229.038	99.345	166.8	32.2014
Tukey's multiple comparisons test	Mean Diff,	95,00% CI of diff,	Significant?	Adjusted P Value
Cntrl vs. UV-AC	-173.6	-219,0 to -128,3	Yes	<0,0001
Cntrl vs. CoV2-AC	-71.19	-116,5 to -25,86	Yes	0.003
Cntrl vs. UV-AC + CoV2	-135.9	-181,2 to -90,54	Yes	<0,0001
Cntrl vs. CoV2	15.52	-29,81 to 60,85	No	0.7898
UV-AC vs. CoV2-AC	102.4	57,10 to 147,8	Yes	0.0002
UV-AC vs. UV-AC + CoV2	37.75	-7,579 to 83,08	No	0.1164
UV-AC vs. CoV2	189.1	143,8 to 234,5	Yes	<0,0001
CoV2-AC vs. UV-AC + CoV2	-64.68	-110,0 to -19,35	Yes	0.0059
CoV2-AC vs. CoV2	86.71	41,38 to 132,0	Yes	0.0007
UV-AC + CoV2 vs. CoV2	151.4	106,1 to 196,7	Yes	<0,0001
