# Supplementary material for: Efferocytosis of SARS-CoV-2-infected dying cells impairs macrophage anti-inflammatory functions and clearance of apoptotic cells
Source: eLife. 2022 Jun 6;11:e74443. doi: 10.7554/eLife.74443 (PMC9262386; doi:10.7554/eLife.74443)
Supplement: Figure 3—figure supplement 1—source data 1. [file elife-74443-fig3-figsupp1-data1.xlsx]

## Sheet: FigS3
Fig S3A
Cntrl	UV-AC	CoV2-AC	CoV2-AC Sup	CoV2
0.001117	0.001129	5.26731	0.033359	1.02087
0.000927	0.001137	6.20077	0.018681	0.647765
0.000966	0.001201	5.79906	0.034627	0.62039
Tukey's multiple comparisons test	Mean Diff,	95,00% CI of diff,	Significant?	Adjusted P Value
Cntrl vs. UV-AC	-0.0001523	-0,6239 to 0,6236	No	>0,9999
Cntrl vs. CoV2-AC	-5.755	-6,378 to -5,131	Yes	<0,0001
Cntrl vs. CoV2-AC Sup	-0.02789	-0,6516 to 0,5958	No	0.9999
Cntrl vs. CoV2	-0.762	-1,386 to -0,1383	Yes	0.0162
UV-AC vs. CoV2-AC	-5.755	-6,378 to -5,131	Yes	<0,0001
UV-AC vs. CoV2-AC Sup	-0.02773	-0,6515 to 0,5960	No	0.9999
UV-AC vs. CoV2	-0.7619	-1,386 to -0,1381	Yes	0.0162
CoV2-AC vs. CoV2-AC Sup	5.727	5,103 to 6,351	Yes	<0,0001
CoV2-AC vs. CoV2	4.993	4,369 to 5,616	Yes	<0,0001
CoV2-AC Sup vs. CoV2	-0.7341	-1,358 to -0,1104	Yes	0.0203
Fig S3B
Cntrl (Vero)	UV-AC (Vero)	CoV2-AC (Vero)	CoV2-AC Sup (Vero)
0.001591	0.012927	14.4219	0.011836
0.011172	0.00098	15.7448	0.03377
0.013981	0	20.6731	0.019827
Tukey's multiple comparisons test	Mean Diff,	95,00% CI of diff,	Significant?	Adjusted P Value
Cntrl (Vero) vs. UV-AC (Vero)	0.004279	-4,303 to 4,311	No	>0,9999
Cntrl (Vero) vs. CoV2-AC (Vero)	-16.94	-21,24 to -12,63	Yes	<0,0001
Cntrl (Vero) vs. CoV2-AC Sup (Vero)	-0.0129	-4,320 to 4,294	No	>0,9999
UV-AC (Vero) vs. CoV2-AC (Vero)	-16.94	-21,25 to -12,64	Yes	<0,0001
UV-AC (Vero) vs. CoV2-AC Sup (Vero)	-0.01718	-4,324 to 4,290	No	>0,9999
CoV2-AC (Vero) vs. CoV2-AC Sup (Vero)	16.92	12,62 to 21,23	Yes	<0,0001
Cntrl (Calu-3)	UV-AC (Calu-3)	CoV2-AC (Calu-3)	CoV2-AC Sup (Calu-3)
0.061276	0.000898	19.512	0.099228
0.001573	0.001603	16.3229	0.108281
0.00121	0.003428	13.1099	0.102469
Tukey's multiple comparisons test	Mean Diff,	95,00% CI of diff,	Significant?	Adjusted P Value
Cntrl (Calu-3) vs. UV-AC (Calu-3)	0.01938	-4,166 to 4,205	No	>0,9999
Cntrl (Calu-3) vs. CoV2-AC (Calu-3)	-16.29	-20,48 to -12,11	Yes	<0,0001
Cntrl (Calu-3) vs. CoV2-AC Sup (Calu-3)	-0.08197	-4,267 to 4,103	No	>0,9999
UV-AC (Calu-3) vs. CoV2-AC (Calu-3)	-16.31	-20,50 to -12,13	Yes	<0,0001
UV-AC (Calu-3) vs. CoV2-AC Sup (Calu-3)	-0.1013	-4,286 to 4,084	No	0.9998
CoV2-AC (Calu-3) vs. CoV2-AC Sup (Calu-3)	16.21	12,03 to 20,40	Yes	<0,0001
Fig S3C
Cntrl (Vero)	UV-AC (Vero)	CoV2-AC (Vero)	CoV2-AC Sup (Vero)
0.011381	0.004972	11.6649	0.545696
0.015684	0.003101	18.907	0.538673
0.012143	0.004387	16.3182	0.493069
Tukey's multiple comparisons test	Mean Diff,	95,00% CI of diff,	Significant?	Adjusted P Value
Cntrl (Vero) vs. UV-AC (Vero)	0.008916	-4,789 to 4,807	No	>0,9999
Cntrl (Vero) vs. CoV2-AC (Vero)	-15.62	-20,41 to -10,82	Yes	<0,0001
Cntrl (Vero) vs. CoV2-AC Sup (Vero)	-0.5127	-5,311 to 4,285	No	0.9852
UV-AC (Vero) vs. CoV2-AC (Vero)	-15.63	-20,42 to -10,83	Yes	<0,0001
UV-AC (Vero) vs. CoV2-AC Sup (Vero)	-0.5217	-5,319 to 4,276	No	0.9845
CoV2-AC (Vero) vs. CoV2-AC Sup (Vero)	15.1	10,31 to 19,90	Yes	<0,0001
Cntrl (Calu-3)	UV-AC (Calu-3)	CoV2-AC (Calu-3)	CoV2-AC Sup (Calu-3)
0.006924	0.015076	9.02105	0.433673
0.011381	0.003306	11.6649	0.614712
0.013681	0.007983	11.0794	0.419108
Tukey's multiple comparisons test	Mean Diff,	95,00% CI of diff,	Significant?	Adjusted P Value
Cntrl (Calu-3) vs. UV-AC (Calu-3)	0.001874	-1,819 to 1,823	No	>0,9999
Cntrl (Calu-3) vs. CoV2-AC (Calu-3)	-10.58	-12,40 to -8,757	Yes	<0,0001
Cntrl (Calu-3) vs. CoV2-AC Sup (Calu-3)	-0.4785	-2,300 to 1,343	No	0.8337
UV-AC (Calu-3) vs. CoV2-AC (Calu-3)	-10.58	-12,40 to -8,759	Yes	<0,0001
UV-AC (Calu-3) vs. CoV2-AC Sup (Calu-3)	-0.4804	-2,301 to 1,341	No	0.8321
CoV2-AC (Calu-3) vs. CoV2-AC Sup (Calu-3)	10.1	8,278 to 11,92	Yes	<0,0001
Fig S3D
Cntrl	CoV2-AC	CoV2-AC + Gly
0	40.2091	39.9527
0.043068	39.6262	43.8754
0	39.9284	41.7813
	43.2203	40.8534
Tukey's multiple comparisons test	Mean Diff,	95,00% CI of diff,	Significant?	Adjusted P Value
Cntrl vs. CoV2-AC	-40.73	-43,90 to -37,57	Yes	<0,0001
Cntrl vs. CoV2-AC + Gly	-41.6	-44,77 to -38,44	Yes	<0,0001
CoV2-AC vs. CoV2-AC + Gly	-0.8697	-3,799 to 2,060	No	0.6854
Fig S3E
Coxsackie-AC	CoV2-AC
31600000	31600000
316000000	31600000
316000000	31600000
316000000	316000000
Unpaired t test
P value	0.207
Significantly different (P < 0.05)?	No
One- or two-tailed P value?	Two-tailed
t, df	t=1,414, df=6
Fig S3F
Cntrl	CoV2-AC	CoV2-AC + Ann +	CoV2-AC + Ann ++
0.011231	0.200161	0.093729	0.065926
0	0.239231	0.119782	0.074406
0	0.391673	0.101145	0.067775
Tukey's multiple comparisons test	Mean Diff,	95,00% CI of diff,	Significant?	Adjusted P Value
Cntrl vs. CoV2-AC	-0.2733	-0,4071 to -0,1394	Yes	0.0008
Cntrl vs. CoV2-AC + Ann +	-0.1011	-0,2350 to 0,03271	No	0.1502
Cntrl vs. CoV2-AC + Ann ++	-0.06563	-0,1995 to 0,06823	No	0.4446
CoV2-AC vs. CoV2-AC + Ann +	0.1721	0,03828 to 0,3060	Yes	0.0142
CoV2-AC vs. CoV2-AC + Ann ++	0.2077	0,07380 to 0,3415	Yes	0.0048
CoV2-AC + Ann + vs. CoV2-AC + Ann ++	0.03552	-0,09834 to 0,1694	No	0.8298
