# Supplementary material for: Efferocytosis of SARS-CoV-2-infected dying cells impairs macrophage anti-inflammatory functions and clearance of apoptotic cells
Source: eLife. 2022 Jun 6;11:e74443. doi: 10.7554/eLife.74443 (PMC9262386; doi:10.7554/eLife.74443)
Supplement: Figure 3—source data 1. [file elife-74443-fig3-data1.xlsx]

## Sheet: Fig3
Fig 3A
Cntrl	UV-AC	CoV2-AC	CoV2
0.001432	0.031296	6.98217	0.0089
0.000689	0.077957	7.3597	0.013587
0.001014	0.071104	9.56377	0
Tukey's multiple comparisons test	Mean Diff,	95,00% CI of diff,	Significant?	Adjusted P Value
Cntrl vs. UV-AC	-0.05907	-1,882 to 1,764	No	0.9996
Cntrl vs. CoV2-AC	-7.968	-9,791 to -6,144	Yes	<0,0001
Cntrl vs. CoV2	-0.006451	-1,830 to 1,817	No	>0,9999
UV-AC vs. CoV2-AC	-7.908	-9,732 to -6,085	Yes	<0,0001
UV-AC vs. CoV2	0.05262	-1,771 to 1,876	No	0.9997
CoV2-AC vs. CoV2	7.961	6,138 to 9,784	Yes	<0,0001
Fig 3B
IL-6
Cntrl	UV-AC	CoV2-AC	CoV2-AC Sup
0.002482	0.091545	2.43167	0.042062
0.001421	0.009022	2.40742	0.017581
0.095076	0.003265	2.21599	0.020867
Tukey's multiple comparisons test	Mean Diff,	95,00% CI of diff,	Significant?	Adjusted P Value
Cntrl vs. UV-AC	-0.001618	-0,1840 to 0,1808	No	>0,9999
Cntrl vs. CoV2-AC	-2.319	-2,501 to -2,136	Yes	<0,0001
Cntrl vs. CoV2-AC Sup	0.006156	-0,1762 to 0,1886	No	0.9995
UV-AC vs. CoV2-AC	-2.317	-2,499 to -2,135	Yes	<0,0001
UV-AC vs. CoV2-AC Sup	0.007774	-0,1746 to 0,1902	No	0.999
CoV2-AC vs. CoV2-AC Sup	2.325	2,142 to 2,507	Yes	<0,0001
IL-1B
Cntrl	UV-AC	CoV2-AC	CoV2-AC Sup
0.010459	0.00563	0.0637476	0.011644
0.003331	0.009769	0.135748	0.009355
0.00699	0.005232	0.0354123	0.006135
Tukey's multiple comparisons test	Mean Diff,	95,00% CI of diff,	Significant?	Adjusted P Value
Cntrl vs. UV-AC	4.967e-05	-0,06791 to 0,06801	No	>0,9999
Cntrl vs. CoV2-AC	-0.07138	-0,1393 to -0,003414	Yes	0.0399
Cntrl vs. CoV2-AC Sup	-0.002118	-0,07008 to 0,06584	No	0.9996
UV-AC vs. CoV2-AC	-0.07143	-0,1394 to -0,003464	Yes	0.0398
UV-AC vs. CoV2-AC Sup	-0.002168	-0,07013 to 0,06579	No	0.9996
CoV2-AC vs. CoV2-AC Sup	0.06926	0,001296 to 0,1372	Yes	0.0459
Fig 3C
Cntrl	UV-AC Ann+	CoV2-AC Ann+	CoV2-AC Ann+L/D+
0.0231678	0.100918	9.74925	0.03539
0.01687	0.168986	8.20275	0.010945
0.019971	0.180953	9.52688	0.048285
Tukey's multiple comparisons test	Mean Diff,	95,00% CI of diff,	Significant?	Adjusted P Value
Cntrl vs. UV-AC Ann+	-0.1303	-1,225 to 0,9645	No	0.9799
Cntrl vs. CoV2-AC Ann+	-9.14	-10,23 to -8,045	Yes	<0,0001
Cntrl vs. CoV2-AC Ann+L/D+	-0.01154	-1,106 to 1,083	No	>0,9999
UV-AC Ann+ vs. CoV2-AC Ann+	-9.009	-10,10 to -7,915	Yes	<0,0001
UV-AC Ann+ vs. CoV2-AC Ann+L/D+	0.1187	-0,9761 to 1,214	No	0.9846
CoV2-AC Ann+ vs. CoV2-AC Ann+L/D+	9.128	8,033 to 10,22	Yes	<0,0001
Fig 3D
Cntrl	UV-AC	CoV2-AC	CoV2-AC UV	CoV2-AC Fix
0.001222	0.001452	4.37875	0.141173	0.064543
0.000823	0.001413	1.09004	0.110342	0.072792
0.006896	0.001491	1.09718	0.218739	0.252208
Dunnett's multiple comparisons test	Mean Diff,	95,00% CI of diff,	Significant?	Adjusted P Value
Cntrl vs. UV-AC	0.001528	-2,004 to 2,007	No	>0,9999
Cntrl vs. CoV2-AC	-2.186	-4,192 to -0,1798	Yes	0.0327
Cntrl vs. CoV2-AC UV	-0.1538	-2,160 to 1,852	No	0.9979
Cntrl vs. CoV2-AC Fix	-0.1269	-2,133 to 1,879	No	0.999
Fig 3E
Cntrl	CoV2-AC	CoV2	Coxsackie-AC	Coxsackie
0.028734	14.5107	0.021858	6.6605	0.0549
0.014341	20.0923	0.018565	6.84525	0.039812
0.015168	38.7529	0.015968	5.7847	0.01998
0.001766	42.1869		6.49728
0.001327	42.688		5.81325
0.001685	60.2175		7.33357
Tukey's multiple comparisons test	Mean Diff,	95,00% CI of diff,	Significant?	Adjusted P Value
Cntrl vs. CoV2-AC	-36.4	-51,26 to -21,53	Yes	<0,0001
Cntrl vs. CoV2	-0.008294	-18,21 to 18,20	No	>0,9999
Cntrl vs. Coxsackie-AC	-6.479	-21,34 to 8,386	No	0.6882
Cntrl vs. Coxsackie	-0.02773	-18,23 to 18,18	No	>0,9999
CoV2-AC vs. CoV2	36.39	18,18 to 54,59	Yes	<0,0001
CoV2-AC vs. Coxsackie-AC	29.92	15,05 to 44,78	Yes	<0,0001
CoV2-AC vs. Coxsackie	36.37	18,16 to 54,58	Yes	<0,0001
CoV2 vs. Coxsackie-AC	-6.47	-24,68 to 11,74	No	0.8199
CoV2 vs. Coxsackie	-0.01943	-21,04 to 21,00	No	>0,9999
Coxsackie-AC vs. Coxsackie	6.451	-11,75 to 24,66	No	0.8215
Fig 3F
Cntrl	Cov2-AC - Ann	Cov2-AC + Ann
0.002036	5.63045	0.09019
0.002036	6.12599	0.116871
	5.93808	0.113947
Tukey's multiple comparisons test	Mean Diff,	95,00% CI of diff,	Significant?	Adjusted P Value
Cntrl vs. Cov2-AC - Ann	-5.896	-6,367 to -5,425	Yes	<0,0001
Cntrl vs. Cov2-AC + Ann	-0.105	-0,5758 to 0,3658	No	0.7602
Cov2-AC - Ann vs. Cov2-AC + Ann	5.791	5,370 to 6,212	Yes	<0,0001
Fig 3G
Cntrl	Cntrl + Cyto	CoV2-AC	Cov2-AC + Cyto
0	0	7.7426	0.152428
0.050306	0	11.6738	0.067395
0	0	11.1976	0.072586
Tukey's multiple comparisons test	Mean Diff,	95,00% CI of diff,	Significant?	Adjusted P Value
Cntrl vs. Cntrl + Cyto	0.01677	-2,789 to 2,823	No	>0,9999
Cntrl vs. CoV2-AC	-10.19	-12,99 to -7,382	Yes	<0,0001
Cntrl vs. Cov2-AC + Cyto	-0.0807	-2,887 to 2,725	No	0.9997
Cntrl + Cyto vs. CoV2-AC	-10.2	-13,01 to -7,399	Yes	<0,0001
Cntrl + Cyto vs. Cov2-AC + Cyto	-0.09747	-2,903 to 2,708	No	0.9995
CoV2-AC vs. Cov2-AC + Cyto	10.11	7,301 to 12,91	Yes	<0,0001
Fig 3H
Cntrl	Cntrl + Remd	CoV2-AC	Cov2-AC + Remd
0	0	1.623	0.79652
0	0	1.395	0.9794
0	0	1.63	0.94568
Tukey's multiple comparisons test	Mean Diff,	95,00% CI of diff,	Significant?	Adjusted P Value
Cntrl vs. Cntrl + Remd	0	-0,2162 to 0,2162	No	>0,9999
Cntrl vs. CoV2-AC	-1.549	-1,766 to -1,333	Yes	<0,0001
Cntrl vs. Cov2-AC + Remd	-0.9072	-1,123 to -0,6910	Yes	<0,0001
Cntrl + Remd vs. CoV2-AC	-1.549	-1,766 to -1,333	Yes	<0,0001
Cntrl + Remd vs. Cov2-AC + Remd	-0.9072	-1,123 to -0,6910	Yes	<0,0001
CoV2-AC vs. Cov2-AC + Remd	0.6421	0,4259 to 0,8583	Yes	<0,0001
