# Supplementary material for: Efferocytosis of SARS-CoV-2-infected dying cells impairs macrophage anti-inflammatory functions and clearance of apoptotic cells
Source: eLife. 2022 Jun 6;11:e74443. doi: 10.7554/eLife.74443 (PMC9262386; doi:10.7554/eLife.74443)
Supplement: Figure 4—figure supplement 1—source data 1. [file elife-74443-fig4-figsupp1-data1.xlsx]

## Sheet: FigS4
Fig S3F
CD36
Cntrl	UV-AC	CoV2-AC	CoV2
1.06231	1.26045	0.700512	1.04101
0.913975	1.10962	0.649172	1.24668
1.02995	1.29158	0.698098	1.24867
Tukey's multiple comparisons test	Mean Diff,	95,00% CI of diff,	Significant?	Adjusted P Value
Cntrl vs. UV-AC	-0.2185	-0,4473 to 0,01034	No	0.0613
Cntrl vs. CoV2-AC	0.3195	0,09067 to 0,5483	Yes	0.009
Cntrl vs. CoV2	-0.1767	-0,4055 to 0,05210	No	0.1395
UV-AC vs. CoV2-AC	0.538	0,3091 to 0,7668	Yes	0.0003
UV-AC vs. CoV2	0.04177	-0,1870 to 0,2706	No	0.934
CoV2-AC vs. CoV2	-0.4962	-0,7250 to -0,2674	Yes	0.0005
SRA1
Cntrl	UV-AC	CoV2-AC	CoV2
1.17639	1.24226	0.263612	0.200389
0.870008	1.16678	0.259569	0.654572
0.977069	1.23476	0.26265	0.205008
Tukey's multiple comparisons test	Mean Diff,	95,00% CI of diff,	Significant?	Adjusted P Value
Cntrl vs. UV-AC	-0.2068	-0,6076 to 0,1940	No	0.405
Cntrl vs. CoV2-AC	0.7459	0,3451 to 1,147	Yes	0.0015
Cntrl vs. CoV2	0.6545	0,2537 to 1,055	Yes	0.0035
UV-AC vs. CoV2-AC	0.9527	0,5519 to 1,353	Yes	0.0003
UV-AC vs. CoV2	0.8613	0,4605 to 1,262	Yes	0.0006
CoV2-AC vs. CoV2	-0.09138	-0,4922 to 0,3094	No	0.8824
ITGB5
Cntrl	UV-AC	CoV2-AC	CoV2
1.19907	1.11392	0.349599	0.478955
1.05167	1.23435	0.320309	0.465815
0.793002	1.3985	0.339405	0.734398
Tukey's multiple comparisons test	Mean Diff,	95,00% CI of diff,	Significant?	Adjusted P Value
Cntrl vs. UV-AC	-0.2343	-0,6173 to 0,1486	No	0.2782
Cntrl vs. CoV2-AC	0.6781	0,2952 to 1,061	Yes	0.0021
Cntrl vs. CoV2	0.4549	0,07189 to 0,8378	Yes	0.0217
UV-AC vs. CoV2-AC	0.9125	0,5295 to 1,295	Yes	0.0003
UV-AC vs. CoV2	0.6892	0,3062 to 1,072	Yes	0.0019
CoV2-AC vs. CoV2	-0.2233	-0,6063 to 0,1597	No	0.3127
TIMD4
Cntrl	UV-AC	CoV2-AC	CoV2
1.16095	0.78589	0.19221	0.273977
0.900466	0.705534	0.170118	0.371733
0.956578	1.12761	0.138219	0.190589
Tukey's multiple comparisons test	Mean Diff,	95,00% CI of diff,	Significant?	Adjusted P Value
Cntrl vs. UV-AC	0.133	-0,2321 to 0,4981	No	0.6624
Cntrl vs. CoV2-AC	0.8391	0,4741 to 1,204	Yes	0.0004
Cntrl vs. CoV2	0.7272	0,3622 to 1,092	Yes	0.001
UV-AC vs. CoV2-AC	0.7062	0,3411 to 1,071	Yes	0.0012
UV-AC vs. CoV2	0.5942	0,2292 to 0,9593	Yes	0.0036
CoV2-AC vs. CoV2	-0.1119	-0,4770 to 0,2532	No	0.7635
MERTK
Cntrl	UV-AC	CoV2-AC	CoV2
0.890644	0.666788	1.34637	0.448348
0.851726	0.779159	1.33017	0.456252
1.31824	0.927287	1.55395	0.835868
Tukey's multiple comparisons test	Mean Diff,	95,00% CI of diff,	Significant?	Adjusted P Value
Cntrl vs. UV-AC	0.2291	-0,2750 to 0,7333	No	0.5033
Cntrl vs. CoV2-AC	-0.39	-0,8941 to 0,1142	No	0.1388
Cntrl vs. CoV2	0.44	-0,06409 to 0,9442	No	0.0888
UV-AC vs. CoV2-AC	-0.6191	-1,123 to -0,1149	Yes	0.0182
UV-AC vs. CoV2	0.2109	-0,2932 to 0,7151	No	0.5657
CoV2-AC vs. CoV2	0.83	0,3259 to 1,334	Yes	0.0033
Fig S3C
Mock + UV-Jurkat	CoV2 + UV-Jurkat
52.6	42.7
52.2	36.2
51.4	45.4
45.3	43.6
Unpaired t test
P value	0.0189
Significantly different (P < 0.05)?	Yes
One- or two-tailed P value?	Two-tailed
t, df	t=3,188, df=6
