# Supplementary material for: Efferocytosis of SARS-CoV-2-infected dying cells impairs macrophage anti-inflammatory functions and clearance of apoptotic cells
Source: eLife. 2022 Jun 6;11:e74443. doi: 10.7554/eLife.74443 (PMC9262386; doi:10.7554/eLife.74443)
Supplement: Figure 4—source data 1. [file elife-74443-fig4-data1.xlsx]

## Sheet: Fig4
Fig 4A
CD36
Cntrl	UV-AC	CoV2-AC	CoV2
1.20167	0.518333	0.0745207	1.15187
0.859037	0.680122	0.0787303	1.14652
0.968732	0.879502	0.0536593
Tukey's multiple comparisons test	Mean Diff,	95,00% CI of diff,	Significant?	Adjusted P Value
Cntrl vs. UV-AC	0.3172	-0,04697 to 0,6813	No	0.0873
Cntrl vs. CoV2-AC	0.9408	0,5767 to 1,305	Yes	0.0003
Cntrl vs. CoV2	-0.1394	-0,5465 to 0,2677	No	0.6826
UV-AC vs. CoV2-AC	0.6237	0,2595 to 0,9878	Yes	0.0032
UV-AC vs. CoV2	-0.4565	-0,8637 to -0,04942	Yes	0.03
CoV2-AC vs. CoV2	-1.08	-1,487 to -0,6731	Yes	0.0002
SRA-I
Cntrl	UV-AC	CoV2-AC	CoV2
1.26325	0.307683	0.109	1.09633
1.03259	0.658436	0.217672	0.912878
0.766619	0.923263	0.120494
Tukey's multiple comparisons test	Mean Diff,	95,00% CI of diff,	Significant?	Adjusted P Value
Cntrl vs. UV-AC	0.391	-0,2030 to 0,9851	No	0.2184
Cntrl vs. CoV2-AC	0.8718	0,2777 to 1,466	Yes	0.0077
Cntrl vs. CoV2	0.01622	-0,6480 to 0,6804	No	0.9998
UV-AC vs. CoV2-AC	0.4807	-0,1133 to 1,075	No	0.1142
UV-AC vs. CoV2	-0.3748	-1,039 to 0,2894	No	0.3207
CoV2-AC vs. CoV2	-0.8556	-1,520 to -0,1914	Yes	0.0153
ITGB5
Cntrl	UV-AC	CoV2-AC	CoV2
1.31461	0.365838	0.160793	1.44849
0.839732	0.792857	0.153324	1.25402
0.905864	1.18169	0.0811949
Tukey's multiple comparisons test	Mean Diff,	95,00% CI of diff,	Significant?	Adjusted P Value
Cntrl vs. UV-AC	0.2399	-0,4738 to 0,9537	No	0.6938
Cntrl vs. CoV2-AC	0.8883	0,1746 to 1,602	Yes	0.0181
Cntrl vs. CoV2	-0.3312	-1,129 to 0,4668	No	0.551
UV-AC vs. CoV2-AC	0.6484	-0,06536 to 1,362	No	0.0742
UV-AC vs. CoV2	-0.5711	-1,369 to 0,2268	No	0.1711
CoV2-AC vs. CoV2	-1.219	-2,017 to -0,4215	Yes	0.0062
TIMD4
Cntrl	UV-AC	CoV2-AC	CoV2
0.973263	0.343048	0.0642054	1.28891
1.0568	0.337209	0.0676441	1.40933
0.972251	0.451282	0.0103167
Tukey's multiple comparisons test	Mean Diff,	95,00% CI of diff,	Significant?	Adjusted P Value
Cntrl vs. UV-AC	0.6236	0,4711 to 0,7761	Yes	<0,0001
Cntrl vs. CoV2-AC	0.9534	0,8009 to 1,106	Yes	<0,0001
Cntrl vs. CoV2	-0.3483	-0,5188 to -0,1779	Yes	0.0011
UV-AC vs. CoV2-AC	0.3298	0,1773 to 0,4823	Yes	0.0008
UV-AC vs. CoV2	-0.9719	-1,142 to -0,8015	Yes	<0,0001
CoV2-AC vs. CoV2	-1.302	-1,472 to -1,131	Yes	<0,0001
MERTK
Cntrl	UV-AC	CoV2-AC	CoV2
1.66636	0.777918	0.0687099	1.55724
0.995682	2.54923	0.109723	1.39769
0.602712	3.93698	0.0671641
Tukey's multiple comparisons test	Mean Diff,	95,00% CI of diff,	Significant?	Adjusted P Value
Cntrl vs. UV-AC	-1.333	-3,752 to 1,086	No	0.3378
Cntrl vs. CoV2-AC	1.006	-1,412 to 3,425	No	0.5492
Cntrl vs. CoV2	-0.3892	-3,094 to 2,315	No	0.9619
UV-AC vs. CoV2-AC	2.34	-0,07935 to 4,758	No	0.0576
UV-AC vs. CoV2	0.9439	-1,760 to 3,648	No	0.6704
CoV2-AC vs. CoV2	-1.396	-4,100 to 1,309	No	0.3865
Fig 4D
UV-AC	CoV2-AC
23.5	27.6
21.6	24.7
37.2	25.7
28.3	30.7
Unpaired t test
P value	0.9027
Significantly different (P < 0.05)?	No
One- or two-tailed P value?	Two-tailed
t, df	t=0,1276, df=6
Fig 4E
UV-AC	CoV2-AC
67.7	22
55	25
56.3	20.6
62	19.6
Unpaired t test
P value	<0,0001
Significantly different (P < 0.05)?	Yes
One- or two-tailed P value?	Two-tailed
t, df	t=12,25, df=6
Fig 4F
UV-AC	CoV2-AC	CoV2-AC + Remdesivir
42.3	31.8	17.5
47.2	31.2	19.8
44.5	28.7	15.6
45	30.4	16.9
Tukey's multiple comparisons test	Mean Diff,	95,00% CI of diff,	Significant?	Adjusted P Value
UV-AC vs. CoV2-AC	14.23	10,82 to 17,63	Yes	<0,0001
UV-AC vs. CoV2-AC + Remdesivir	27.3	23,89 to 30,71	Yes	<0,0001
CoV2-AC vs. CoV2-AC + Remdesivir	13.08	9,668 to 16,48	Yes	<0,0001
