# Supplementary material for: Efferocytosis of SARS-CoV-2-infected dying cells impairs macrophage anti-inflammatory functions and clearance of apoptotic cells
Source: eLife. 2022 Jun 6;11:e74443. doi: 10.7554/eLife.74443 (PMC9262386; doi:10.7554/eLife.74443)
Supplement: Figure 5—source data 1. [file elife-74443-fig5-data1.xlsx]

## Sheet: Fig5
Fig 5A
Healthy	2.03349	2.16442	1.44042	2.16357	1.76223	1.91576	1.25499	1.82771	1.47289	1.71745	1.11971	1.13557	1.34692	1.31431	1.16953	1.11502	1.3507	1.85801	1.50208	1.66425	1.20694	1.91351	1.64979	1.83853	2.30951	2.0514	1.44928	1.13887	1.28222	1.10244	1.10633	1.10999	1.11622	1.1348	1.13498	1.13961	1.15266	1.1536	1.15452	1.17875	1.17894	1.18048	1.18821	1.19397	1.20254	1.23371	1.23937	1.2401	1.25417
COVID19	0.55435	0.515687	0.578788	0.539699	0.507159	0.514153	0.481744	0.454586	0.47809	0.55464	0.525982	0.625275	0.4487	0.490387	0.496015	0.51272	0.545251	0.649694	0.48023	0.606515	0.539215	0.568477	0.607299	0.545306	0.569781	0.569935	0.503161	0.484504	0.473633	0.618196	0.591863	0.544994	0.596174	0.510261	0.533396	0.607802	0.55151	0.57891	0.556584	0.530747	0.554339	0.50918	0.531936	0.524652	0.536838	0.472046	0.545142	0.580845	0.551386
Mann Whitney test
P value	<0,0001
Exact or approximate P value?	Approximate
Significantly different (P < 0.05)?	Yes
One- or two-tailed P value?	Two-tailed
Sum of ranks in column A,B	386520 , 80541
Mann-Whitney U	31400
Fig 5B
Healthy	1.85458	2.28943	2.23761	2.23706	1.16783	1.568	1.80343	2.19645	1.57319	1.1777	1.80309	1.39075	1.56757	1.82824	2.12797	1.12334	2.22831	1.56951	2.36908	2.22077	2.12334	1.60124	1.80251	1.35164	1.85656	2.52243	2.24702	1.32823	1.47435	1.75315	1.07934	1.64531	0.836529	1.3603	1.19033	1.49884	1.34675	1.55729	1.76216	1.45618	1.58148	1.46454	1.82127	1.90611	2.11245	1.75701	2.15311	1.00268	1.14506
COVID19	0.672698	0.649436	0.72169	0.899224	0.852836	0.986651	0.769318	0.675785	0.790007	0.885553	0.665035	1.00881	0.922945	0.934817	0.895893	0.824859	0.734204	0.821711	0.779809	0.824063	0.741696	0.766087	0.788866	0.751121	0.789712	0.658163	0.665614	0.832011	0.760085	0.806682	0.871978	0.814119	0.707273	0.84639	0.784173	0.894938	0.693577	0.713885	0.7686	0.752106	0.769714	0.865998	0.985671	0.854398	0.739101	0.733705	0.750095	0.816039	0.77363
Mann Whitney test
P value	0.0155
Exact or approximate P value?	Approximate
Significantly different (P < 0.05)?	Yes
One- or two-tailed P value?	Two-tailed
Sum of ranks in column A,B	127765 , 161415
Mann-Whitney U	64575
[truncated: 604 more columns]
