# Supplementary figures and images for: Efferocytosis of SARS-CoV-2-infected dying cells impairs macrophage anti-inflammatory functions and clearance of apoptotic cells
Source: eLife journal article supplement (doi:10.7554/elife.74443), 2022-05-31

A

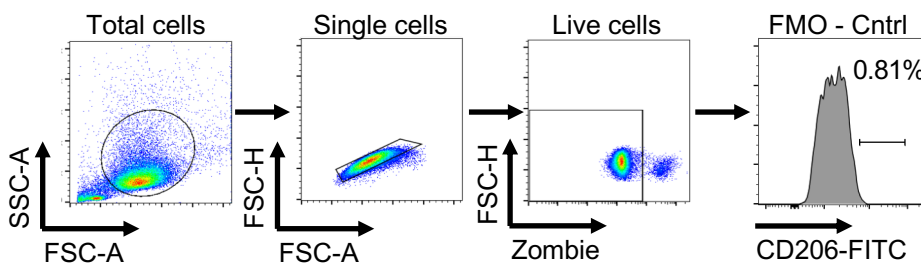

B

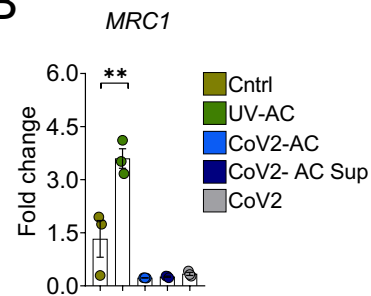

C

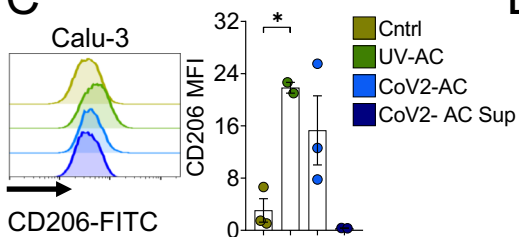

D

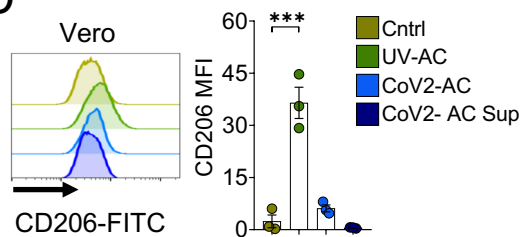

E

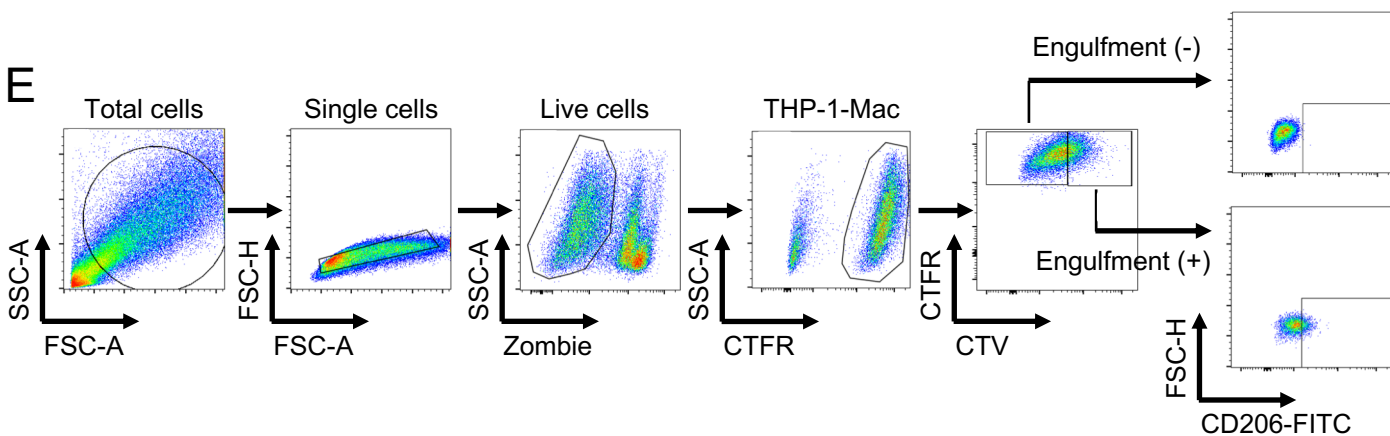

F

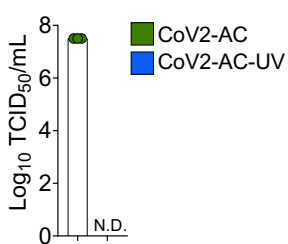

Supplement: supp [file elife-74443-supp-v1.zip]

**Figure 1 – figure supplement 1**

**Salina, dos-Santos, Rodrigues *et al.***

**A**

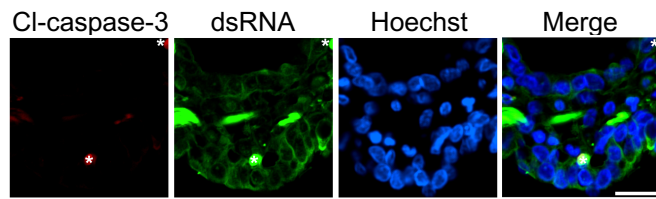

**B**

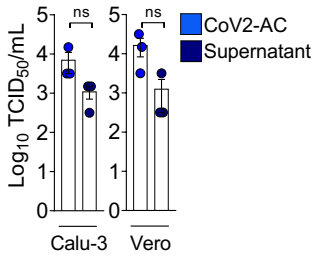

**C**

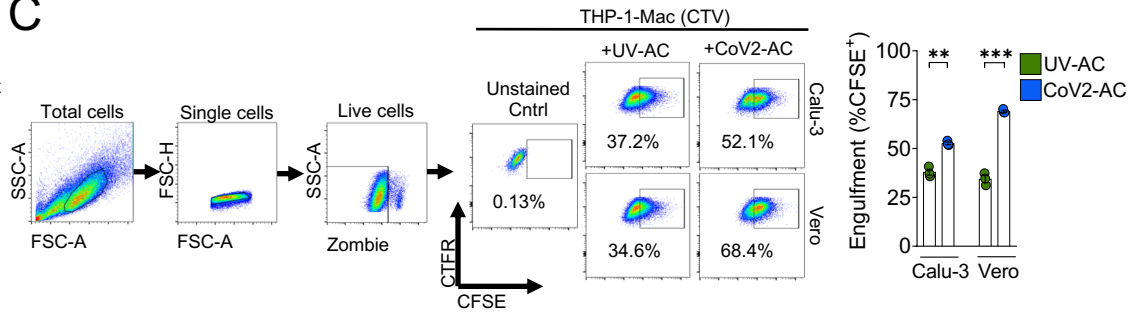

**D**

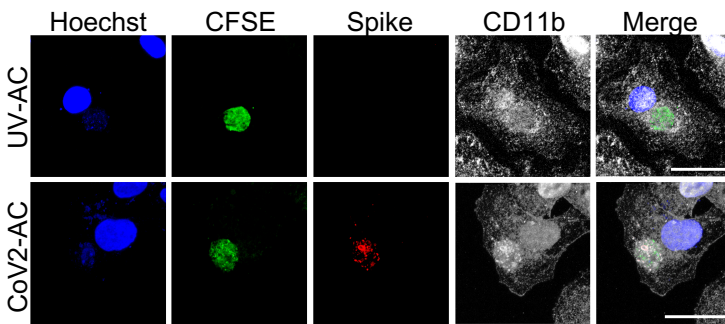

**E**

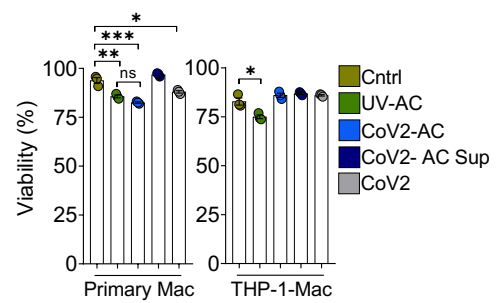

Supplement: supp [file elife-74443-supp-v1.zip]

A

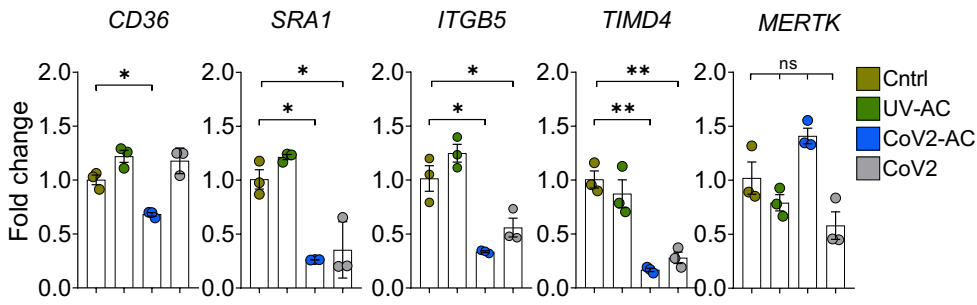

B

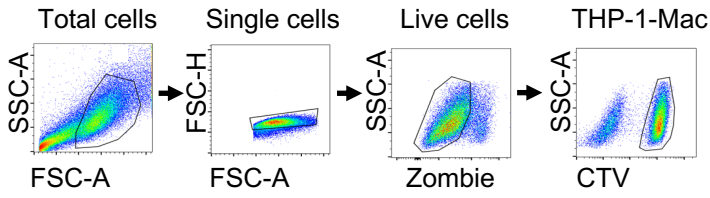

C

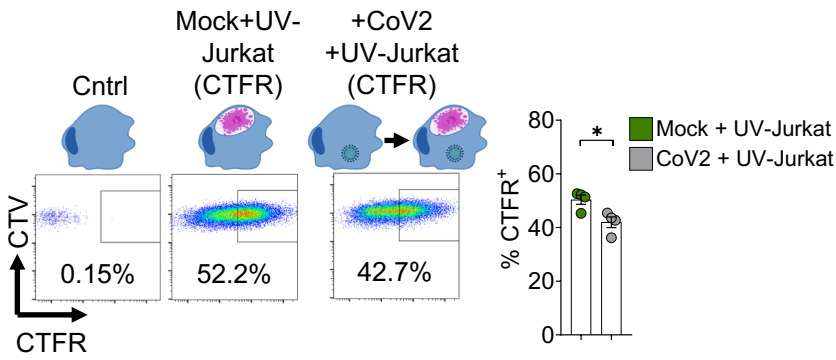

Supplement: supp [file elife-74443-supp-v1.zip]

A

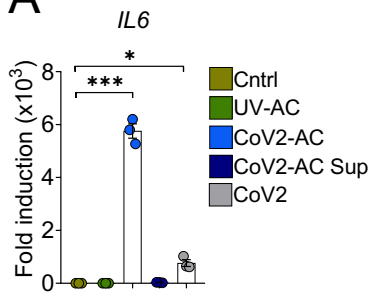

B

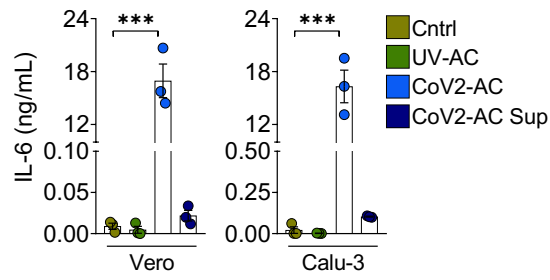

C

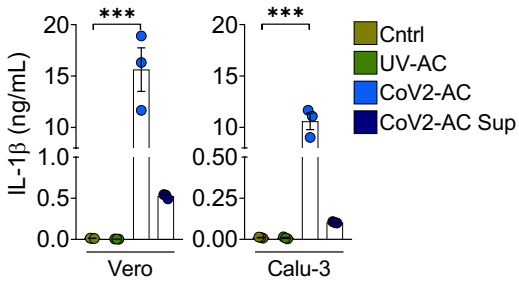

D

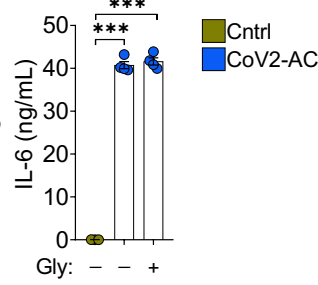

E

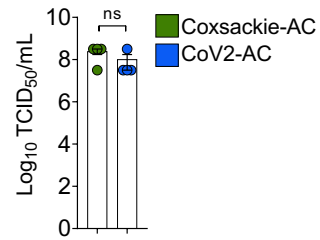

F

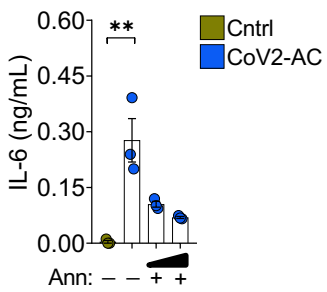

Supplement: supp [file elife-74443-supp-v1.zip]
